# Supplementary material for: Comparison of Peripheral and Central Schizophrenia Biomarker Profiles
Source: PLoS One. 2012 Oct 30;7(10):e46368. doi: 10.1371/journal.pone.0046368 (PMC3484150; doi:10.1371/journal.pone.0046368)
Supplement: Table S1 — The complete list of analytes investigated on the MyriadRBM DiscoveryMAP platform July 2009. Excel file. (XLSX) [file pone.0046368.s003.xlsx]

## Sheet: Sheet1
Alpha 1-Antichymotrypsin
Alpha-1 Antitrypsin
ACE (CD143) Angiotensin Converting Enzyme
ACTH (Adrenocorticotropic Hormone)
Adiponectin
Agouti-Related Protein (AgRP)
Alpha-2 Macroglobulin
Alpha-Fetoprotein
Alpha-1-Microglobulin
Amphiregulin
Angiopoietin 2 (ANG-2)
Angiotensinogen
Apolipoprotein A1
Apolipoprotein A2
Apolipoprotein CI
Apolipoprotein CIII
Apolipoprotein H
Apolipoprotein A-IV
Apolipoprotein B
Apolipoprotein D
Apolipoprotein E
Clusterin (Apo J)
AXL
Beta-2 Microglobulin
B-Lymphocyte Chemoattractant (BLC)
BMP-6
Brain-Derived Neurotrophic Factor
Betacellulin
Complement 3
Cancer Antigen 125
Cancer Antigen 19-9
Calbindin
Calcitonin
CD40
CD40 Ligand
CD5L
Carcinoembryonic Antigen
CgA
Creatine Kinase-MB
Ciliary Neurotrophic Factor (CNTF)
Complement Factor H
Connective Tissue Growth Factor (CTGF)
Cortisol
C-peptide
C Reactive Protein
Cystatin C
EGF
EGF-R
ENA-78
Endothelin-1
EN-RAGE
Eotaxin
Eotaxin-3
Epiregulin
Erythropoietin
E-Selectin
Fatty Acid Binding Protein
Factor VII
FAS
Fas-Ligand
Ferritin
Fetuin A
FGF basic
FGF-4
Fibrinogen
FSH (Follicle Stimulation Hormone)
G-CSF
Growth Hormone
GLP-1 total (Glucagon-like Peptide-1, total)
Glucagon
Glutathione S-Transferase alpha (GST-alpha)
GM-CSF
GRO-alpha
Haptoglobin
HB-EGF
HCC-4
Hepatocyte Growth Factor (HGF)
Heat Shock Protein 60
I-309
ICAM-1
IFN-gamma
IgA
IgE
IGF-1
IGF BP-2
IgM
IL-10
IL-11
IL-12p40
IL-12p70
IL-13
IL-15
IL-16
IL-17
IL-17E
IL-18
IL-1alpha
IL-1beta
IL-1ra
IL-2
IL-23
IL-3
IL-4
IL-5
IL-6
IL-6 Receptor
IL-7
IL-8
Insulin
IP-10 (Inducible Protein-10)
Kidney Injury Molecule-1 (KIM-1)
Leptin
LH (Luteinizing Hormone)
Lipoprotein (a)
Lymphotactin
MCP-1
MCP-2
MCP-3
MCP-4
M-CSF
MDC
MIF
Gamma-Interferon-induced-Monokine
MIP-1alpha
MIP-1beta
MIP-3 alpha
MMP-1
MMP10
MMP-2
MMP-3
MMP7
MMP9 (Total)
MMP-9
Myeloid Progenitor Inhibitory Factor 1
Myeloperoxidase
Myoglobin
Neutrophil Gelatinase-Associated Lipocalin (NGAL)
NGFb
NrCAM
Osteopontin
PAI-1
Pancreatic polypeptide
Prostatic Acid Phosphatase
PAPP-A
Pulmonary and Activation-Regulated Chemokine (PARC)
PDGF
Progesterone
Proinsulin, Intact
Proinsulin, Total
Prolactin
Protein S
Prostate Specific Antigen, Free
PYY
RANTES
Resistin
S100b
Serum Amyloid P
Stem Cell Factor
Secretin
SGOT
SHBG
SOD
Sortilin
sRAGE
Tamm-Horsfall Protein (THP)
Thyroxine Binding Globulin
Thymus-Expressed Chemokine (TECK)
Tenascin C
Testosterone
Tissue Factor
TGF-alpha
TGF-beta 3
TIMP-1
TNF RII
TNF-alpha
TNF-beta
Thrombopoietin
TRAIL-R3
Transferrin
Trefoil Factor 3 (TFF3)
Thyroid Stimulating Hormone
Thrombospondin-1
TTR (prealbumin)
VCAM-1
VEGF
Vitronectin
von Willebrand Factor
